# Supplementary material for: How much does Ne vary among species?
Source: bioRxiv or medRxiv preprint supplement (doi:10.1101/861849), 2020-05-15

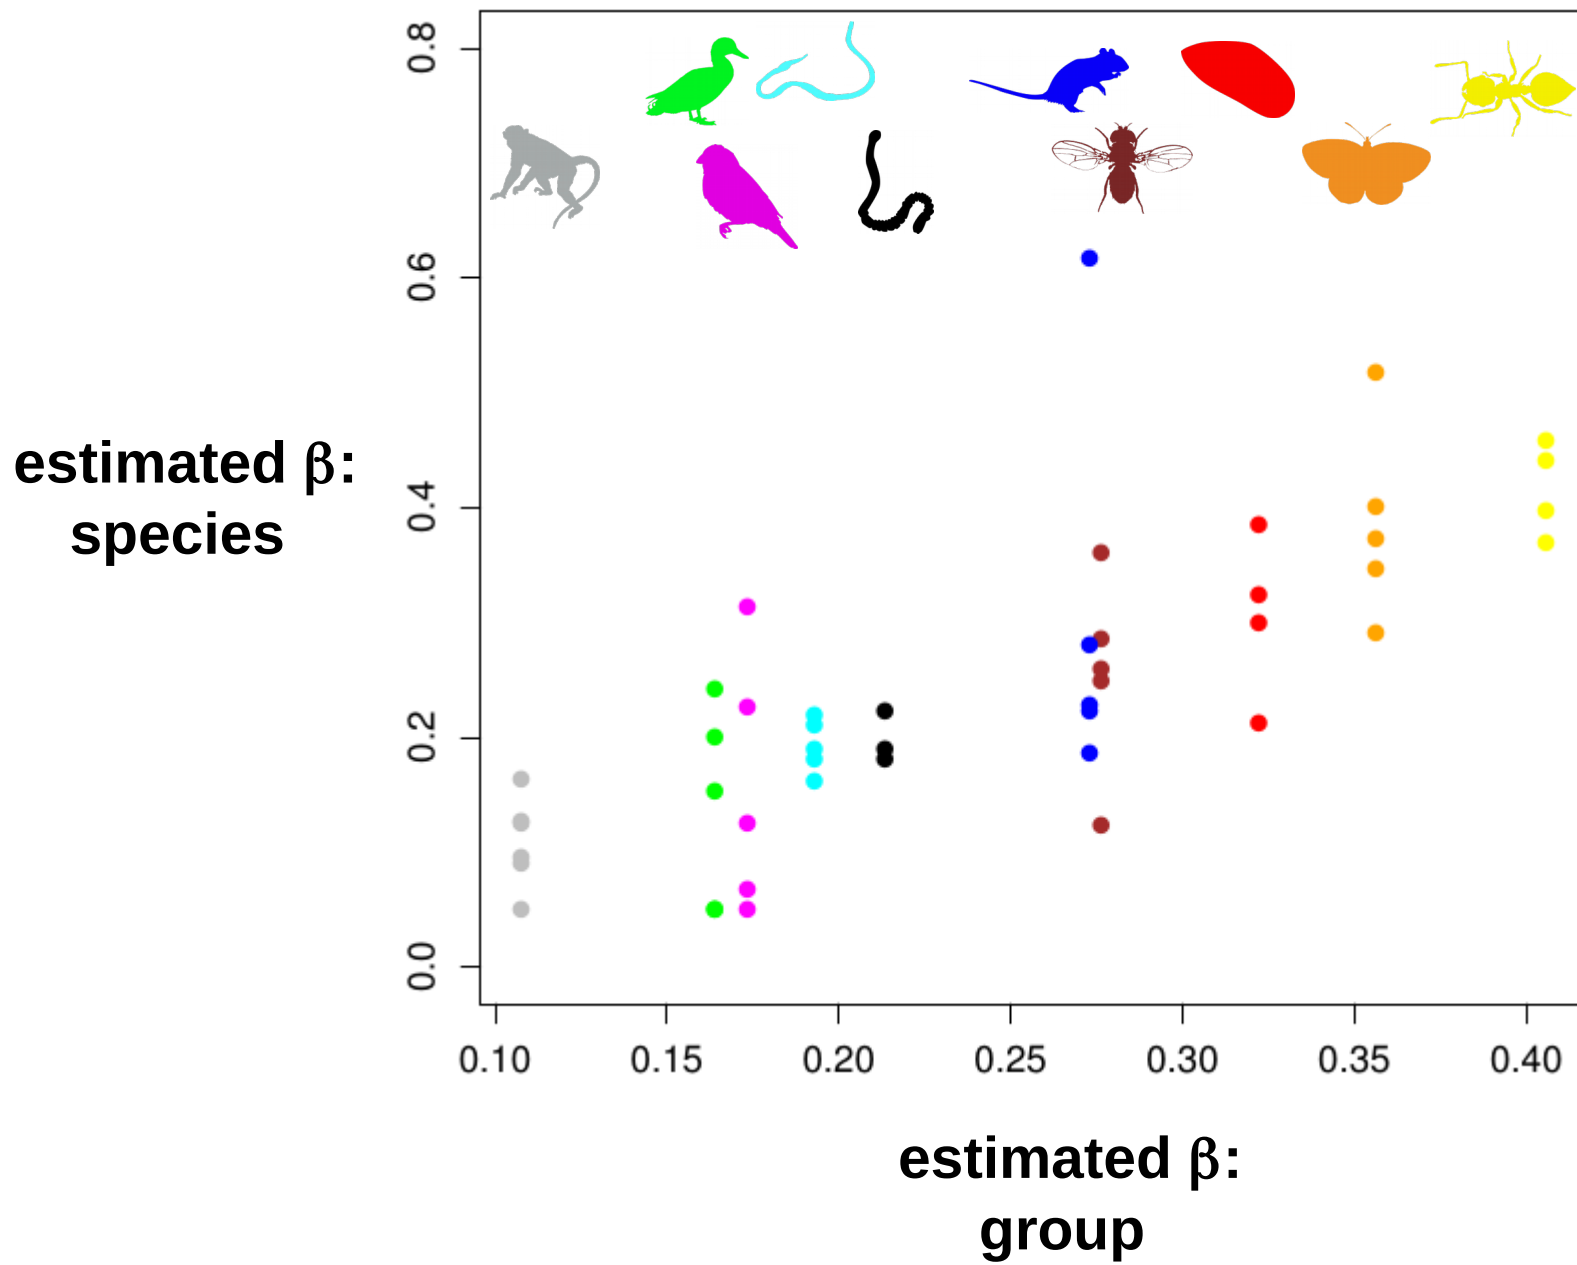

Supplement: Supplementary file [file media-3.pdf]
